# Supplementary material
Source: PubMed Central journal article supplement (PMC4120810)
Supplement: Supp_Figure1.pdf [file Supp_Figure1.pdf]

## Supplementary Data

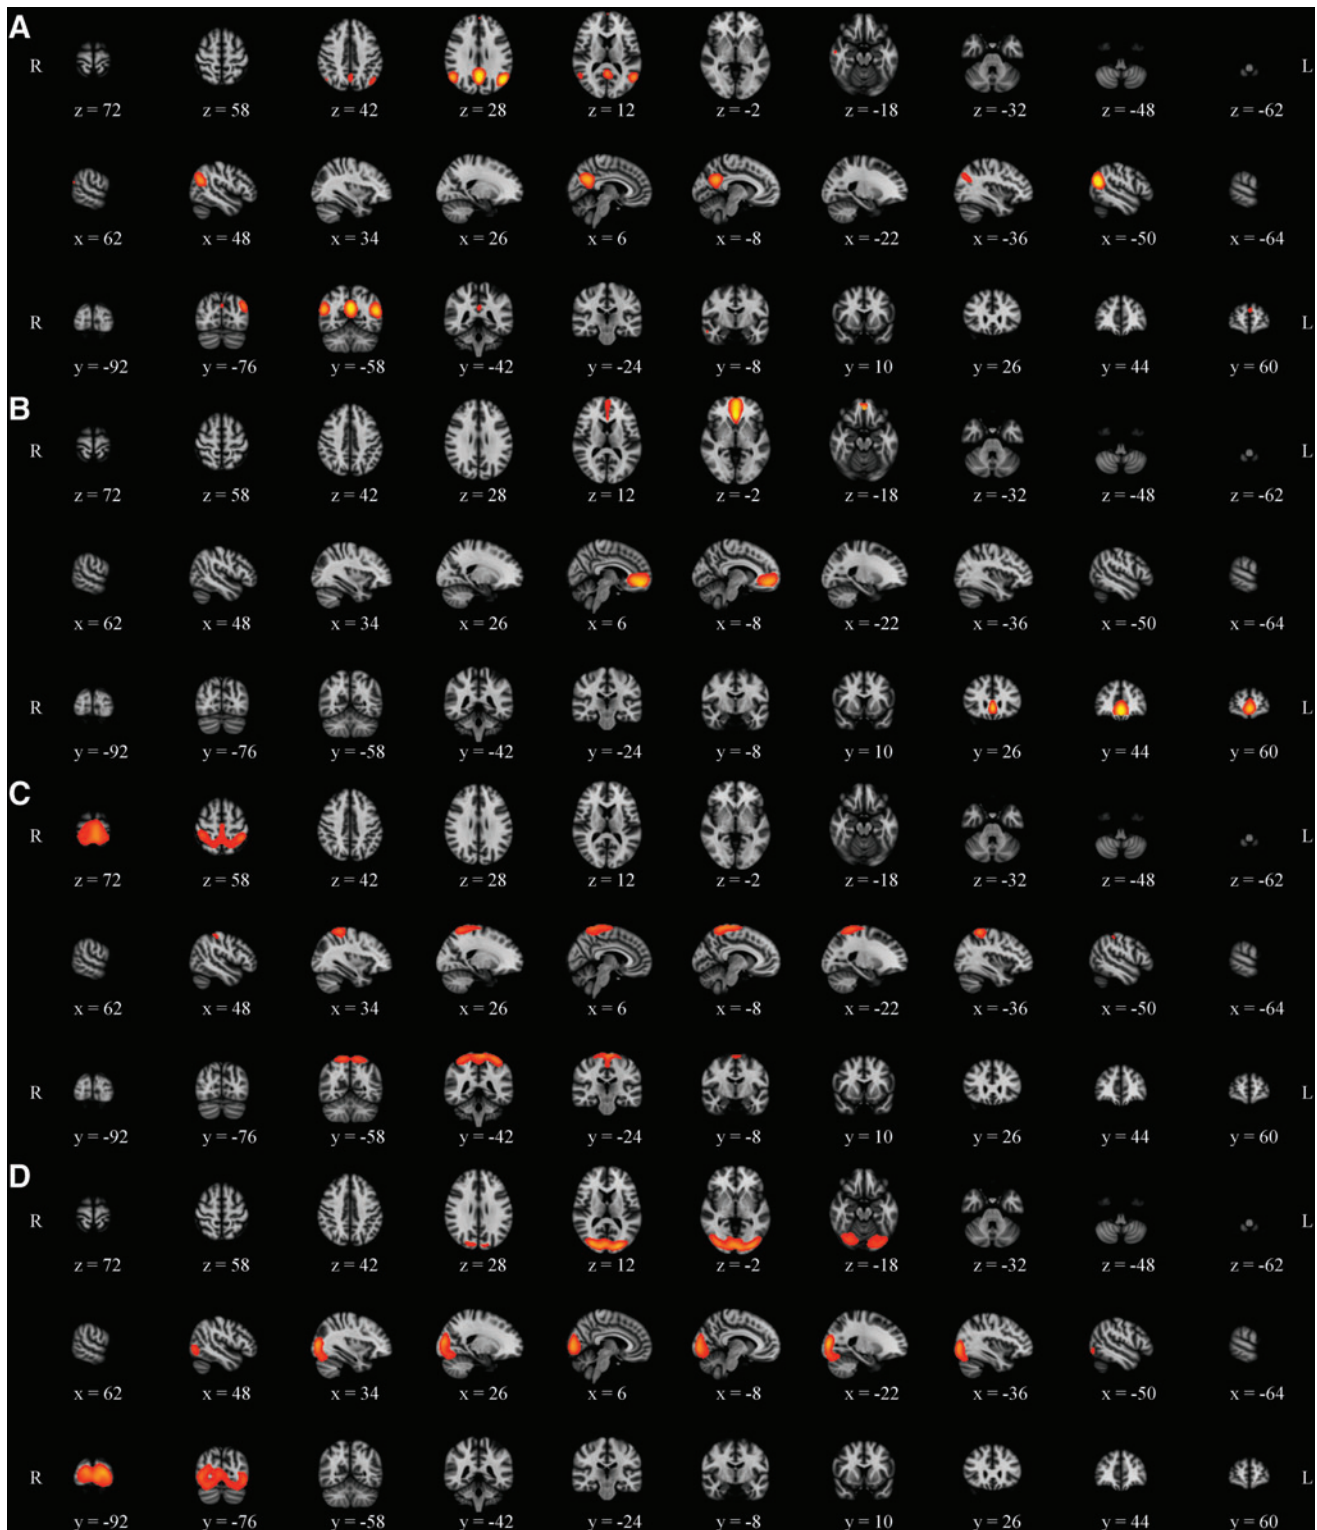

**SUPPLEMENTARY FIG. S1.** Axial, coronal, and sagittal slices for the eight brain network components derived using independent component analysis in 84 children and a total sequence time of 8.2 min (246 TRs). The classification of the networks are (A) default mode network (DMN); (B) frontal network (likely component of anterior DMN); (C) sensorimotor network; (D) visual network; (E) right frontoparietal network; (F) left frontoparietal network; (G) salience network; (H) auditory network. TR, repetition times.

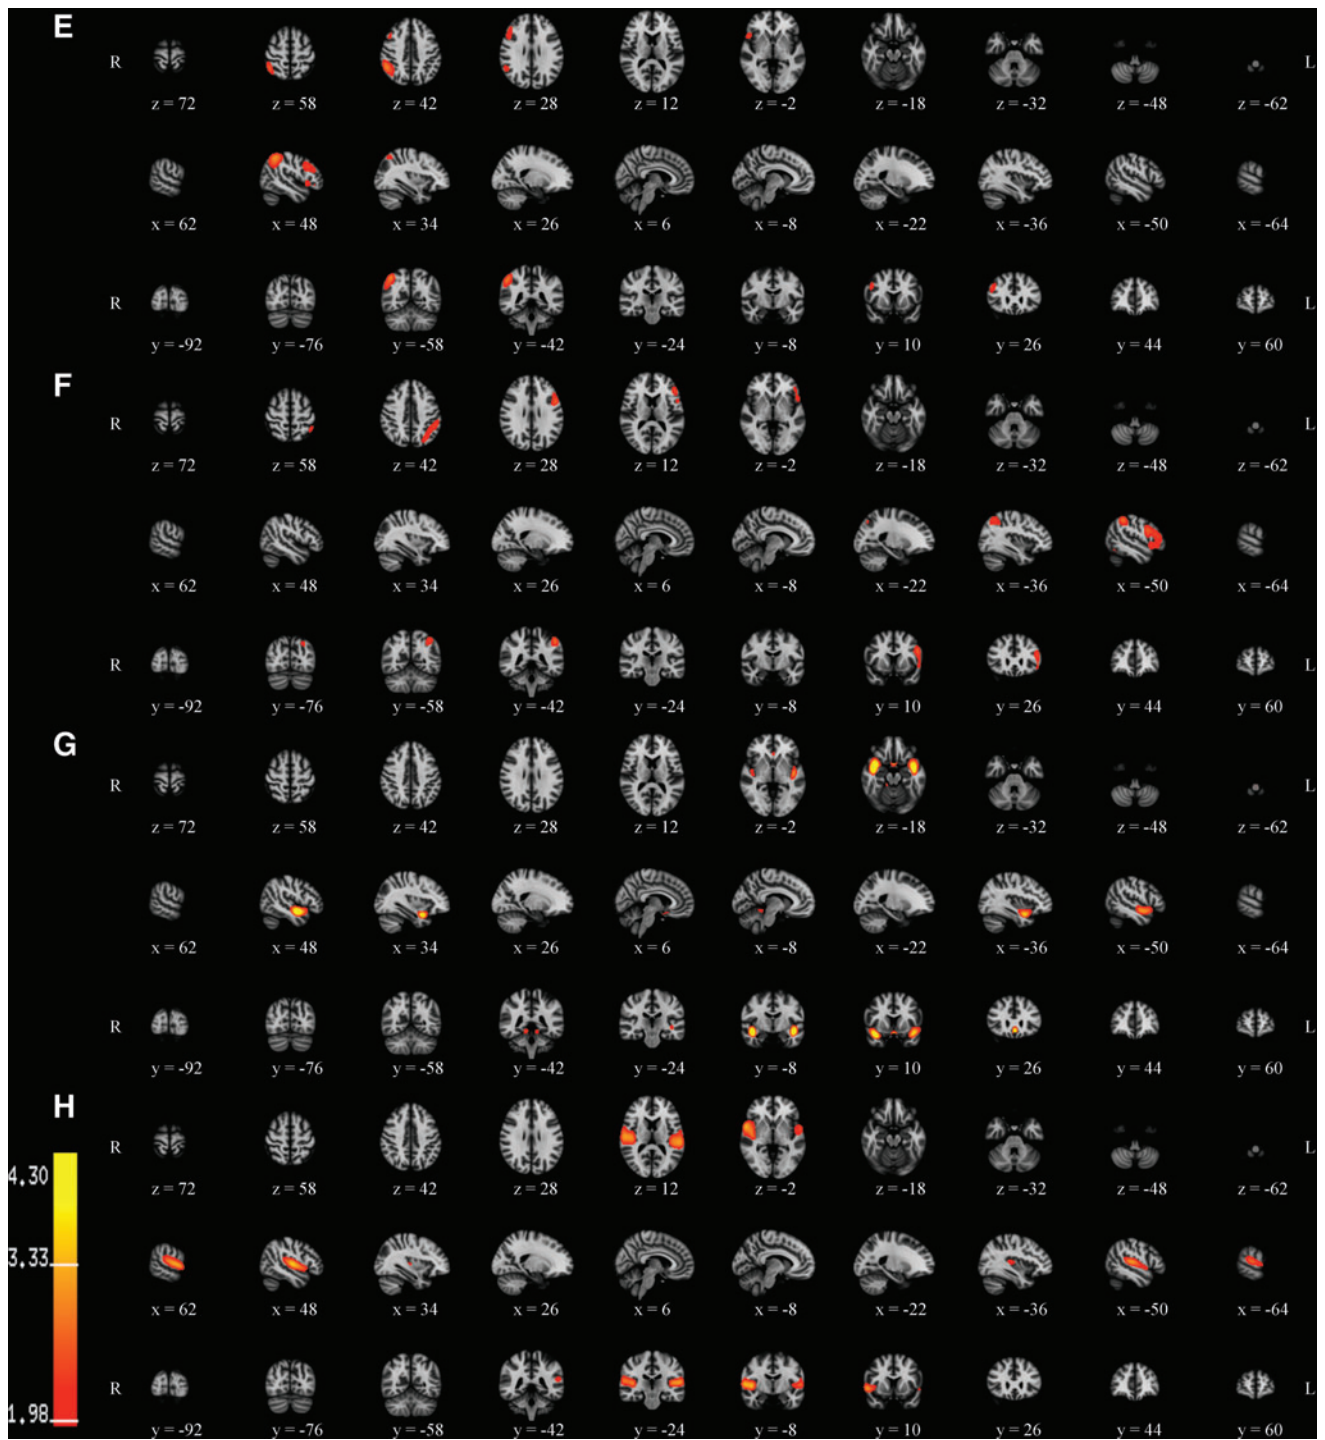

SUPPLEMENTARY FIG. S1. (Continued).
