# Supplementary material
Source: PubMed Central journal article supplement (PMC4120810)
Supplement: Supp_Figure2.pdf [file Supp_Figure2.pdf]

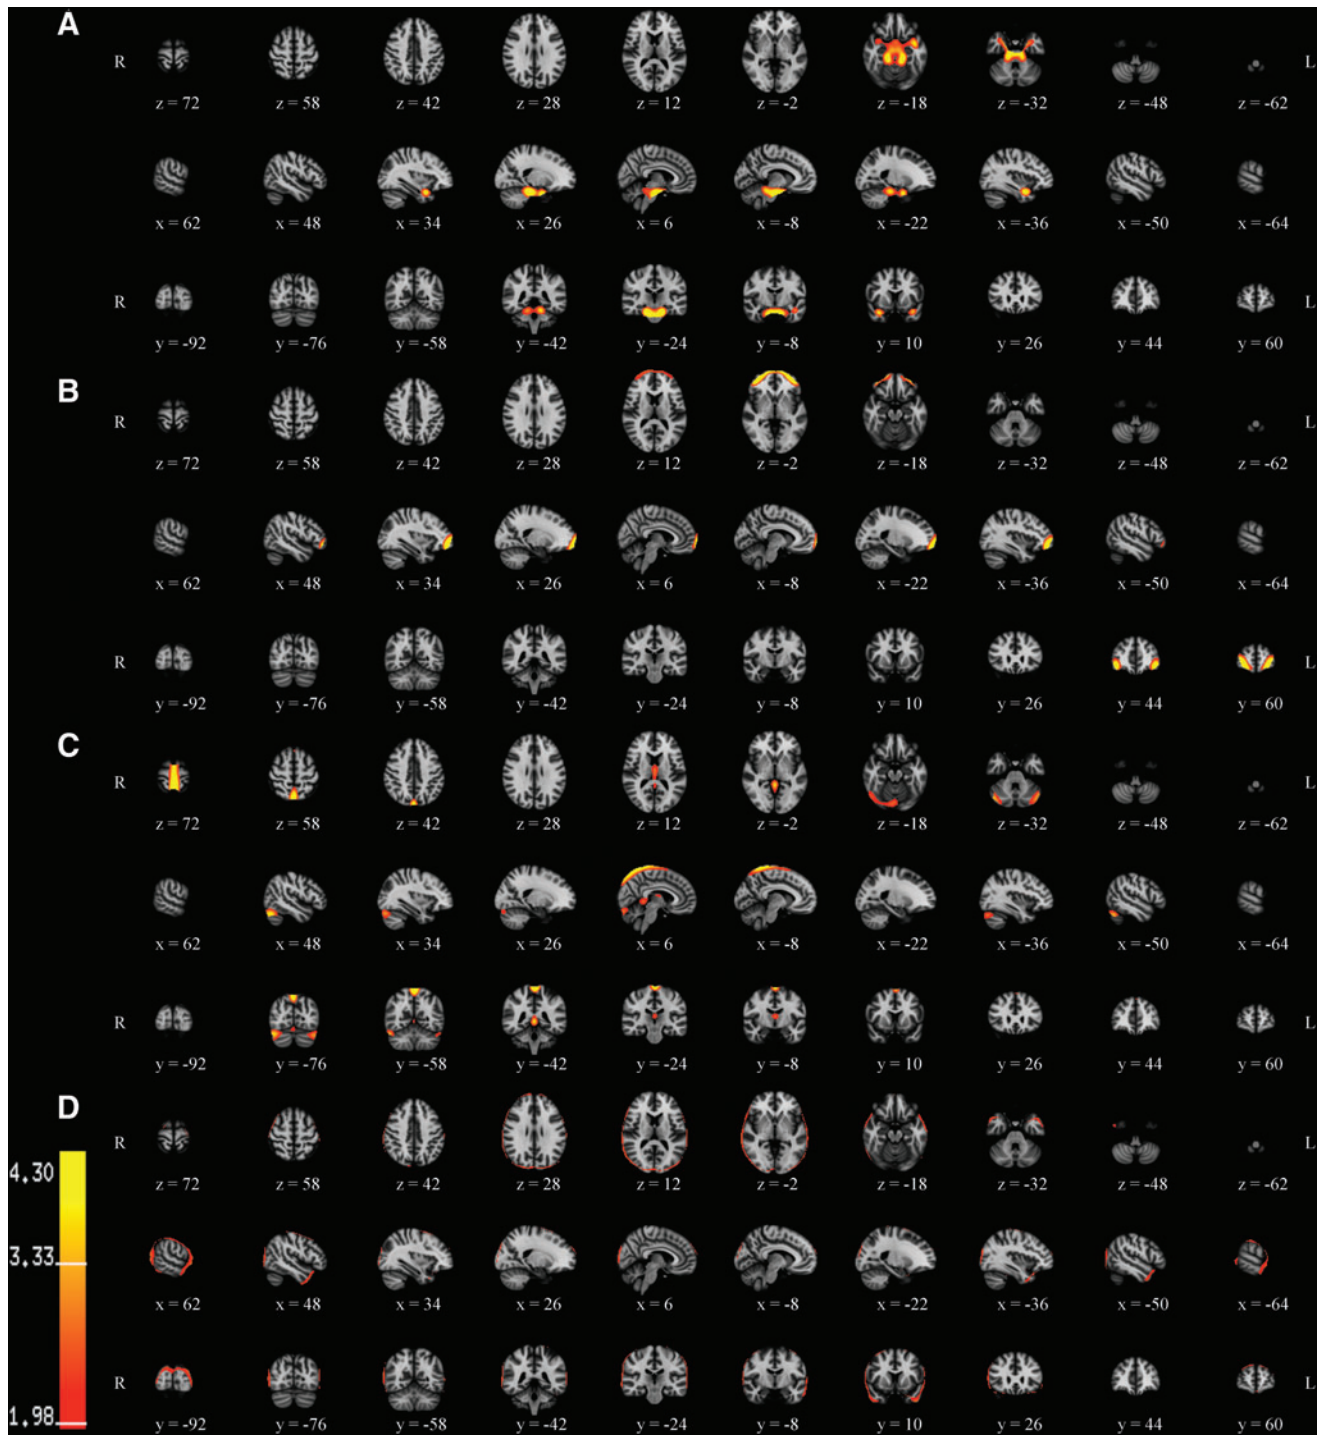

**SUPPLEMENTARY FIG. S2.** Axial, coronal, and sagittal slices for the four noise network components extracted using independent component analysis in 84 children and a total sequence time of 8.2 min (246 TRs). The classification of the networks are (A) flow artifact; (B) frontal movement; (C) ventricular and midline movement; (D) “ring of fire” due to head motion.
