# Supplementary material
Source: PubMed Central journal article supplement (PMC4120810)
Supplement: Supp_Figure3.pdf [file Supp_Figure3.pdf]

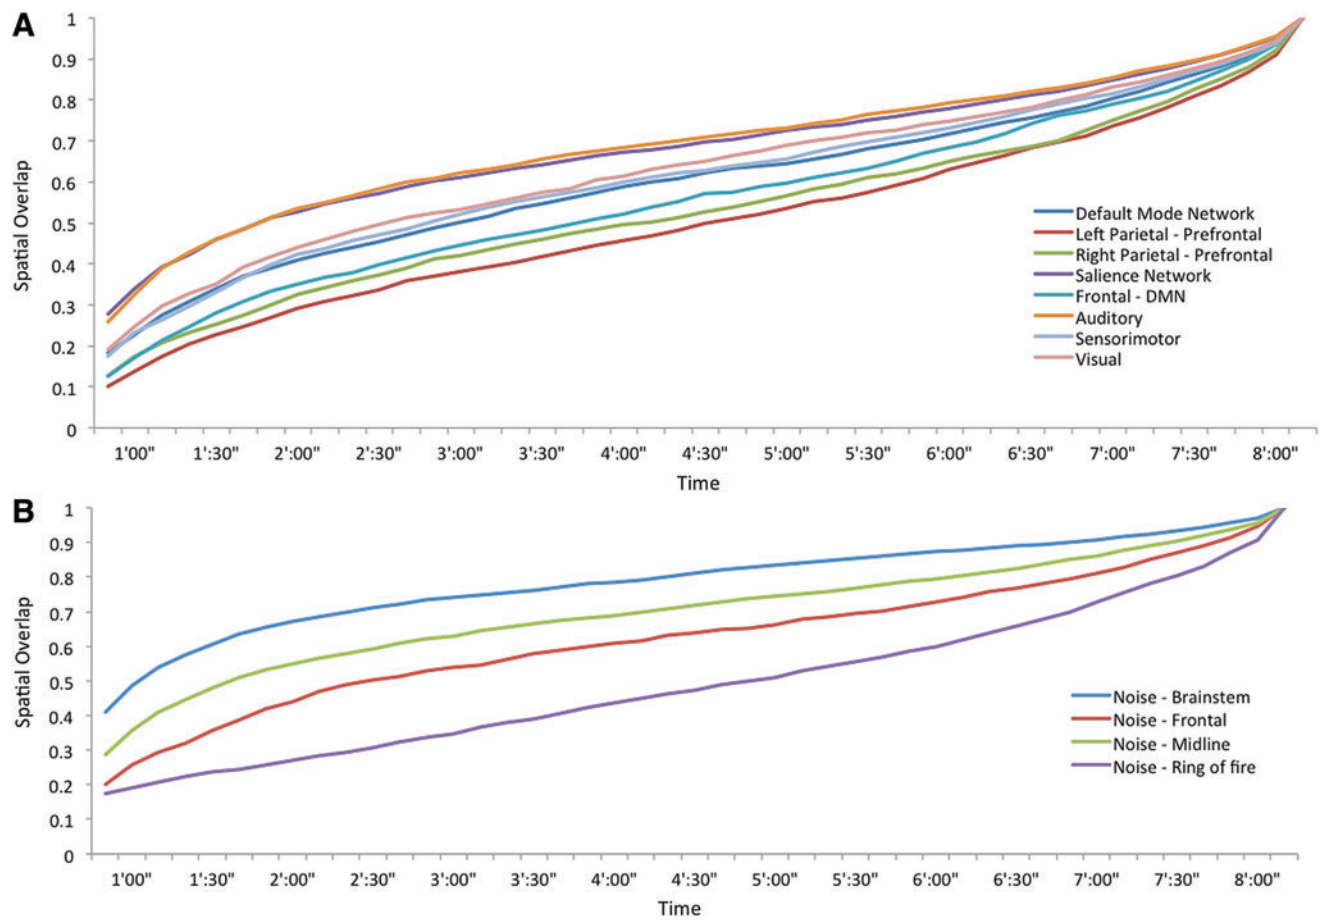

**SUPPLEMENTARY FIG. S3.** Network stability of the group mean of 84 subjects from the dual regression analyses, **(A)** eight brain network components and **(B)** four noise components, with respect to time of acquisition.
