# Supplementary material
Source: PubMed Central journal article supplement (PMC4120810)
Supplement: Supp_Figure4.pdf [file Supp_Figure4.pdf]

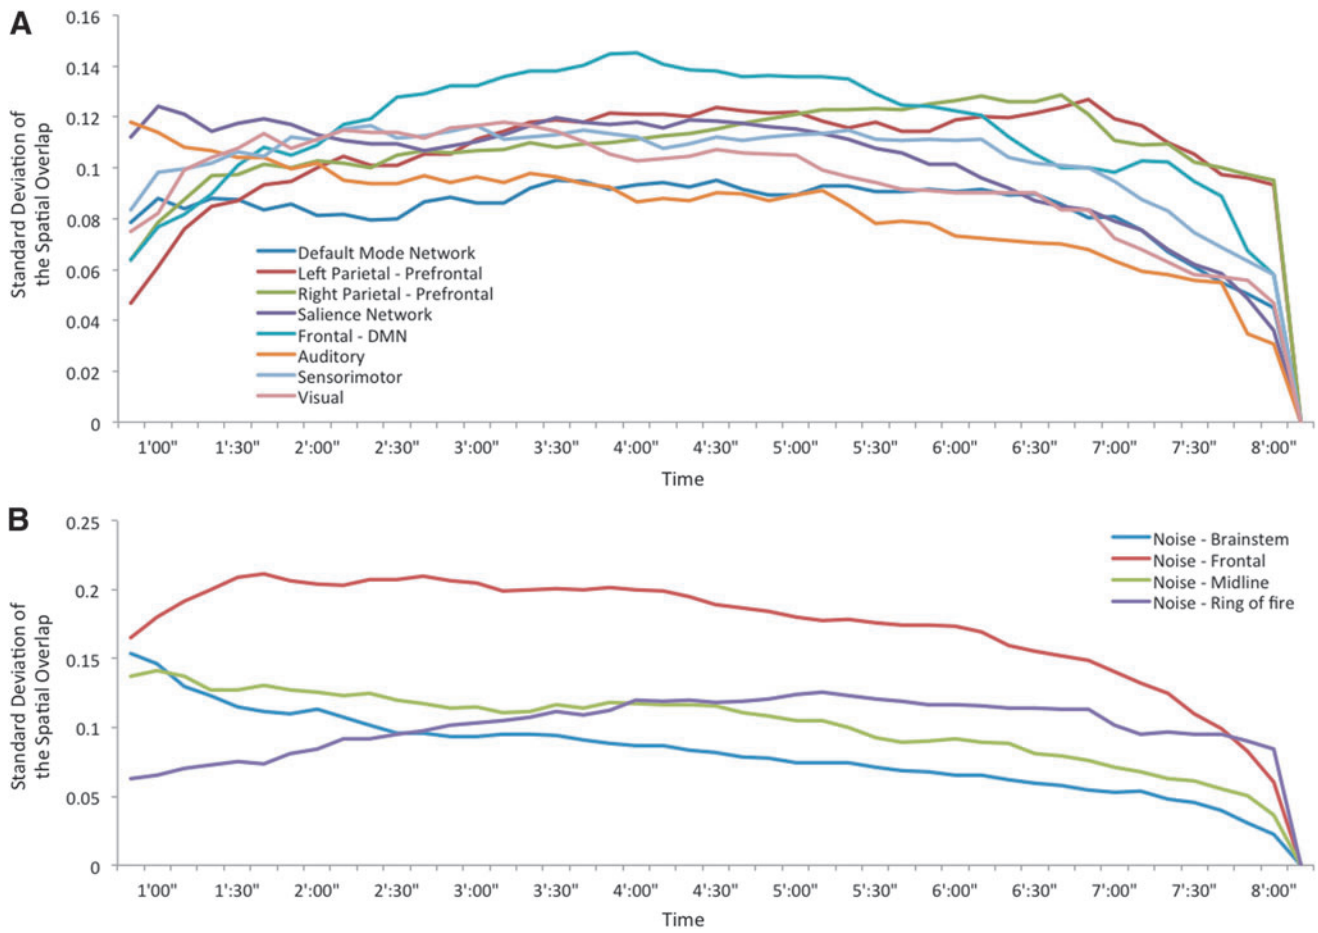

**SUPPLEMENTARY FIG. S4.** Brain network stability of the group standard deviation of 84 subjects from the dual regression analyses, (A) eight brain network components and (B) four noise components, with respect to time of acquisition.
