# Supplementary material
Source: PubMed Central journal article supplement (PMC4120810)
Supplement: Supp_Figure5.pdf [file Supp_Figure5.pdf]

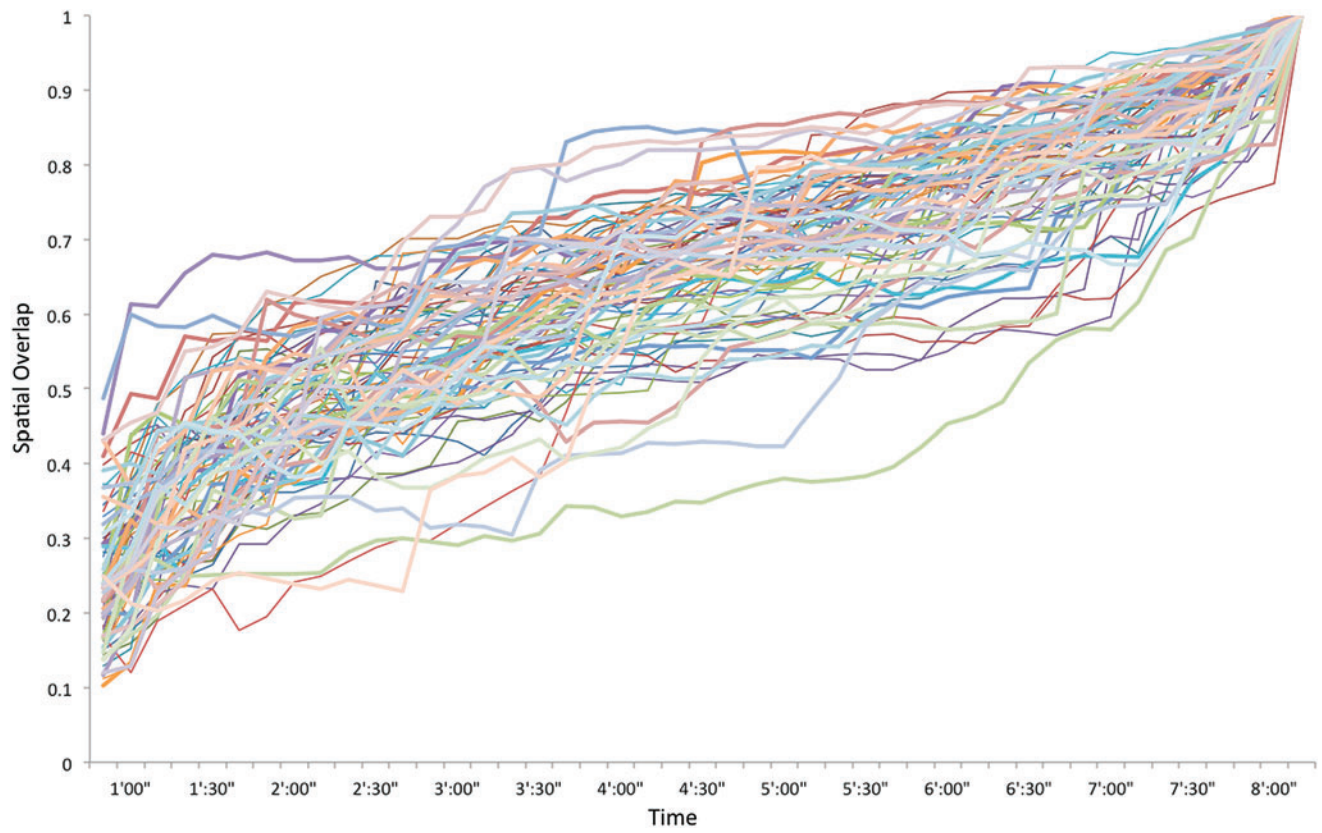

**SUPPLEMENTARY FIG. S5.** Network stability of the DMN in 84 subjects from the dual regression analyses with respect to time of acquisition.
