# Supplementary material
Source: PubMed Central journal article supplement (PMC4120810)
Supplement: Supp_Figure6.pdf [file Supp_Figure6.pdf]

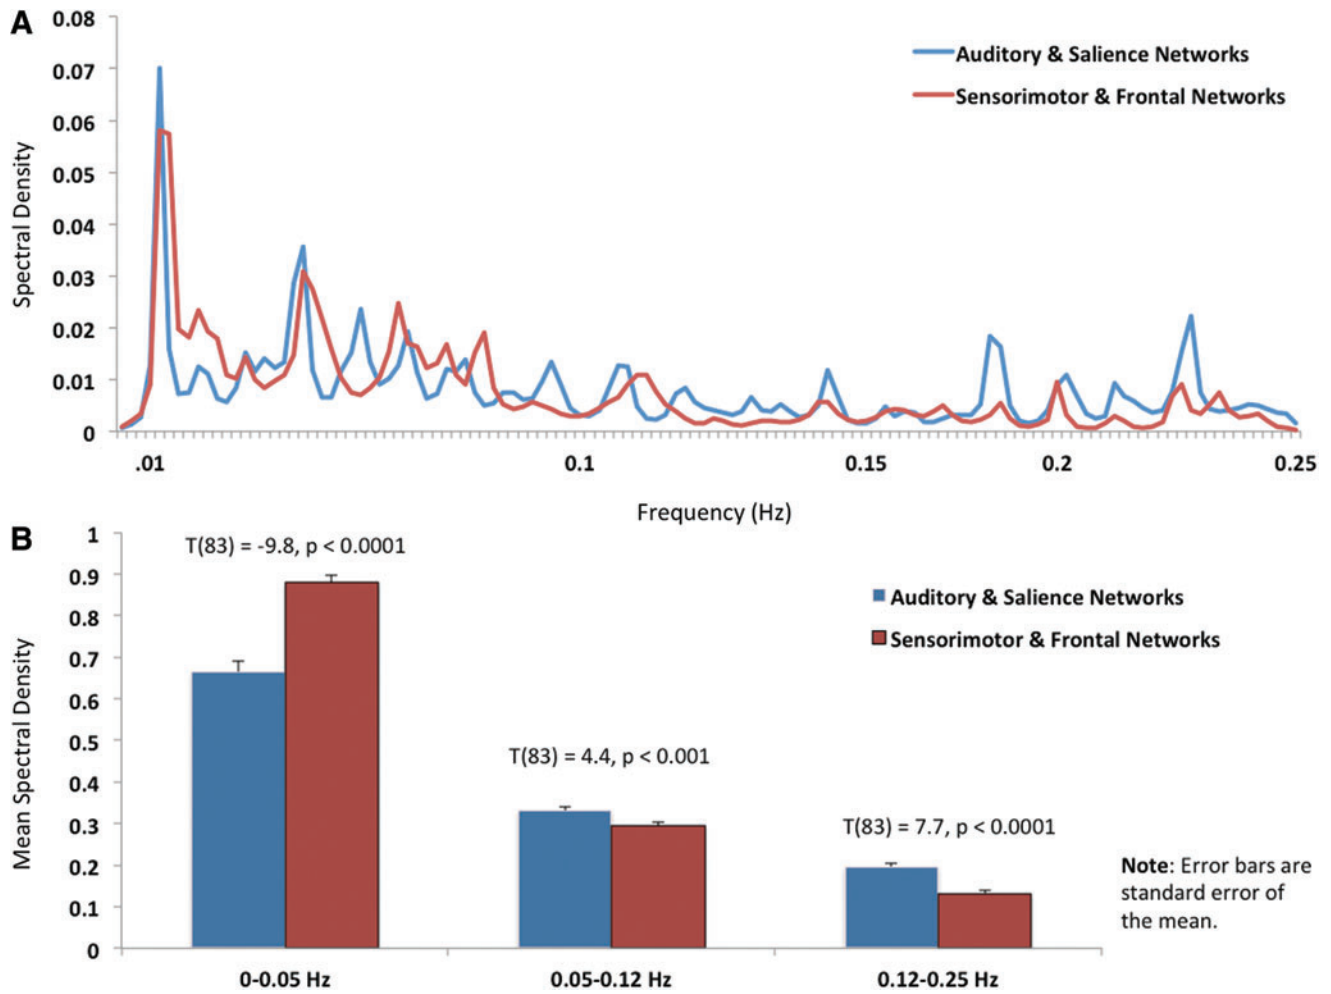

**SUPPLEMENTARY FIG. S6.** Power spectrum of the auditory and salience networks compared to the sensorimotor and frontal networks. (A) The full power spectrum for the components. (B) The mean normalized power between low, medium, and high frequency bands.
